# Supplementary material for: N-Methyl-2-pyrrolidone-assisted solvothermal synthesis of nanosize orthorhombic lithium iron phosphate with improved Li-storage performance
Source: Royal Society of Chemistry journal article supplement (doi:10.1039/c2jm32962j), 2012-01-01
Supplement: c2jm32962j.pdf [file c2jm32962j.pdf]

## Electronic supplementary information for

# Facile solvothermal process for lithium iron phosphate with improved Li-storage performance

Xiaofei Liu,<sup>a</sup> Jia-Qi Huang,<sup>b</sup> Qiang Zhang,<sup>\*b</sup> Xin-Yan Liu,<sup>b</sup> Hong-Jie Peng,<sup>b</sup> Wancheng Zhu,<sup>\*a</sup> Fei Wei<sup>\*b</sup>

<sup>a</sup> Department of Chemical Engineering, Qufu Normal University, Shandong 273165, China.

Email: zhuwancheng@tsinghua.org.cn (W.C. Zhu).

<sup>b</sup> Beijing Key Laboratory of Green Chemical Reaction Engineering and Technology, Department of Chemical Engineering, Tsinghua University, Beijing 100084, China.

Email: zhang-qiang@mails.tsinghua.edu.cn (Q. Zhang); wf-dce@tsinghua.edu.cn (F. Wei).

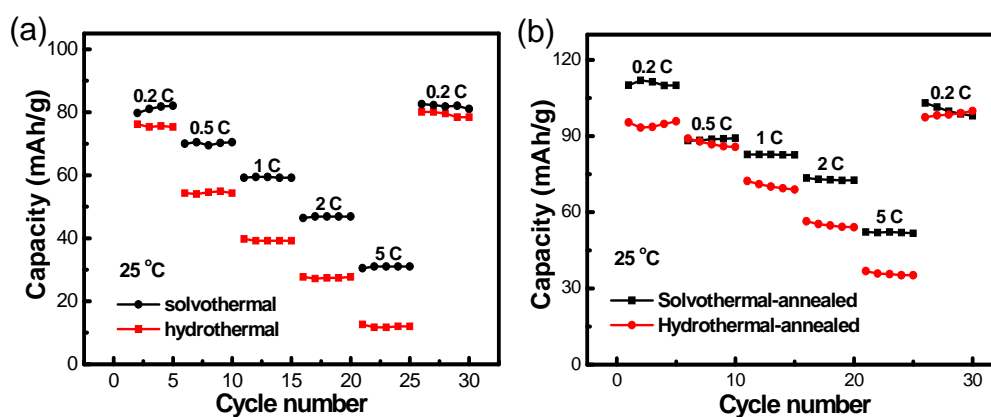

**Fig. S1.** Rate performance of hydro- and solvo-thermal LiFePO<sub>4</sub> NPs (a) pristine and (b) annealed at 700 °C in Ar/H<sub>2</sub> at the room temperature.

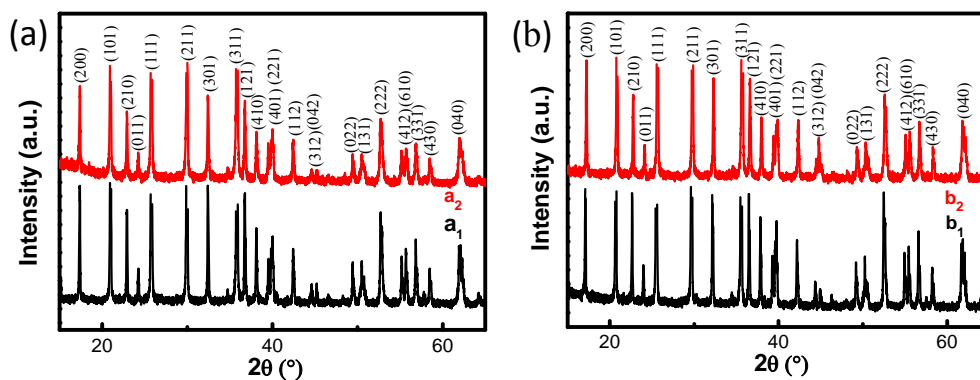

**Fig. S2.** The XRD patterns of the hydro- and solvo-thermal LiFePO<sub>4</sub> NPs annealed (a) with or (b) without carbon source at 700 °C in the Ar/H<sub>2</sub>. a<sub>1</sub>, b<sub>1</sub>: hydrothermal LiFePO<sub>4</sub> annealed NPs and LiFePO<sub>4</sub>/C NPs; a<sub>2</sub>, b<sub>2</sub>: solvothermal LiFePO<sub>4</sub> annealed NPs and LiFePO<sub>4</sub>/C NPs.

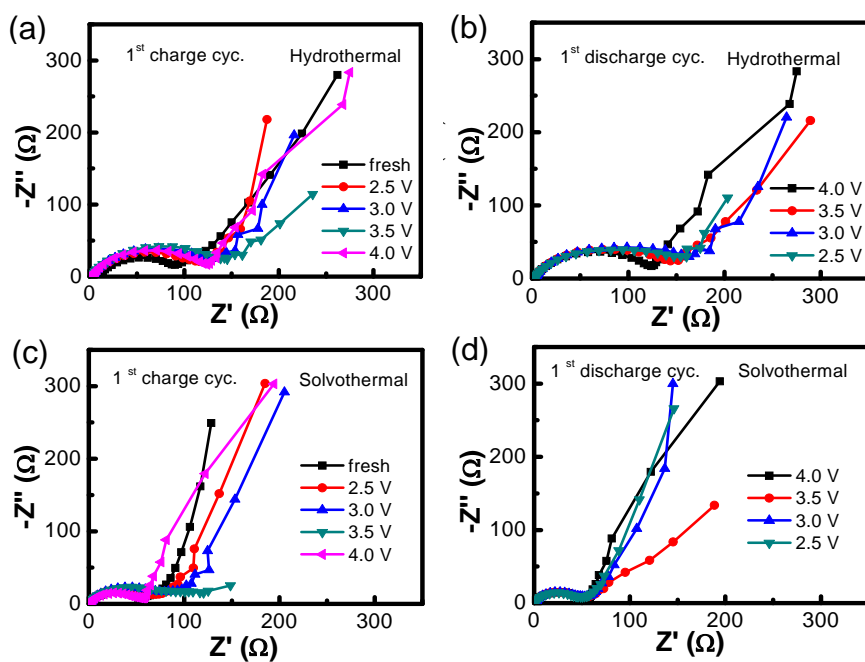

**Fig. S3.** Nyquist plots ( $Z'$  vs  $-Z''$ ) of hydro- and solvo- thermal  $\text{LiFePO}_4/\text{C}$  vs.  $\text{Li}/\text{Li}^+$  during (a, c) first charge cycle and (b, d) discharge cycle at various voltage.

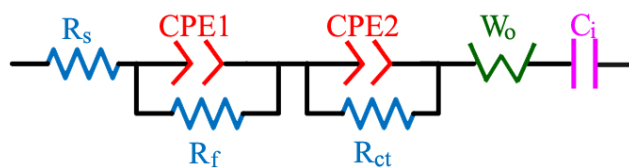

**Fig. S4.** Equivalent circuit of the corresponding Nyquist plots.

**Table S1.** Impedance parameters of hydro- and solvo- thermal LiFePO<sub>4</sub>/C during first charge and discharge cycle at various voltages.

| Potential                                     |                 | OCV | 2.5 | 3.0 | 3.5 | 4.0 |
|-----------------------------------------------|-----------------|-----|-----|-----|-----|-----|
| Hydrothermal<br>1 <sup>st</sup> charge cyc    | Rs(±0.3), Ω     | 11  | 5   | 4   | 4   | 4   |
|                                               | R(f+ct) (±3), Ω | 70  | 97  | 105 | 102 | 100 |
| Hydrothermal<br>1 <sup>st</sup> discharge cyc | Rs(±0.3), Ω     | -   | 4   | 4   | 4   | 4   |
|                                               | R(f+ct) (±3), Ω | -   | 112 | 122 | 119 | 100 |
| Solvothermal<br>1 <sup>st</sup> charge cyc    | Rs(±0.3), Ω     | 2   | 2   | 2   | 2   | 2   |
|                                               | R(f+ct) (±3), Ω | 54  | 61  | 69  | 87  | 43  |
| Solvothermal<br>1 <sup>st</sup> discharge cyc | Rs(±0.3), Ω     | -   | 2   | 2   | 2   | 2   |
|                                               | R(f+ct) (±3), Ω | -   | 43  | 44  | 47  | 43  |
